# Supplementary material
Source: Royal Society of Chemistry journal article supplement (doi:10.1039/d5nj04713g)
Supplement: d5nj04713g1.pdf [file d5nj04713g1.pdf]

1  
2  
3  
4  
5  
6  
7  
8  
9  
10  
11  
12  
13  
14  
15  
16  
17  
18

## Supporting Information

### Insight into citric acid-enhanced abiotic degradation of benzo[a]pyrene: transformation of iron species and hydroxyl radical production

*Yunhao Wu<sup>a</sup>, Yiwen Ou<sup>a</sup>, Shixu Feng<sup>a</sup>, and Hongxia Zhao<sup>a,\*</sup>*

<sup>a</sup> Key Laboratory of Industrial Ecology and Environmental Engineering (Ministry of Education), School of Environmental Science and Technology, Dalian University of Technology, Dalian, 116024, China

\*Corresponding author phone: +86-411-84706552; Fax: +86-411-84706552

Email: [hxzhao@dlut.edu.cn](mailto:hxzhao@dlut.edu.cn)

---

List of Supporting Material

- 
- 19
- 20 **Text S1.** Chemicals.
- 21 **Text S2.** Methods of soil physicochemical properties.
- 22 **Text S3.** Purification method of soil samples.
- 23 **Text S4.** Quantification of  $\cdot\text{OH}$ .
- 24 **Text S5.** Electron paramagnetic resonance (EPR) analysis.
- 25 **Text S6.** Determination of dissolved and adsorbed Fe in soil.
- 26 **Text S7.** Cyclic voltammetry (CV) test.
- 27 **Text S8.** Determination of the intermediates of BaP.
- 28 **Table S1.** Physicochemical Properties of the Soil in this Study.
- 29 **Table S2.** Physicochemical properties of the selected LMWOAs in this study.
- 30 **Table S3.** Physicochemical properties of the selected PAHs in this study.
- 31 **Table S4.** Identified degradation products of BaP degradation by the CA group.
- 32 **Fig. S1.** Changes in soil pH in the presence of CA.
- 33 **Fig. S2.** Degradation rates of BaP with  $\text{H}_2\text{SO}_4$  in sterilized soil.
- 34 **Fig. S3.** Persistent free radicals (PFRs) generation with the addition of CA in  
35 contaminated soil.
- 36 **Fig. S4.** Degradation rates of BaP with  $\text{N}_2$  in sterilized soil.
- 37 **Fig. S5.** The BaP of 30 days natural degradation curve in different kinds of soil with  
38 CA.
- 39 **Figure S6.** The BaP degradation in different concentration of  $\text{FeSO}_4$  with CA.
- 40 **Fig. S7.** Mass spectra of P1, P2, and P3 products identified in the BaP degradation  
41 process.

---

42 **Fig. S8.** Mass spectra of P4, P5, and P6 products identified in the BaP degradation  
43 process.

44 **Fig. S9.** Mass spectra of P7, P8, and P9 products identified in the BaP degradation  
45 process.

46 **Fig. S10.** Mass spectra of P10, P11, and P12 products identified in the BaP  
47 degradation process.

48 **Fig. S11.** Mass spectra of P13 product identified in the BaP degradation process.

---

#### 49 **Text S1. Chemicals**

50 Benzo(a)anthracene (BaA,  $\geq 98.0\%$ ), Benzo(a)pyrene (BaP,  $\geq 95.0\%$ ),  
51 Indeno(1,2,3-cd)pyrene (IcdP,  $\geq 95.0\%$ ) and Dibenzo(a,h)anthracene (DaA,  $\geq 95.0\%$ )  
52 were obtained from Aladdin Biochemical Technology Co., Ltd. Citric acid (CA,  
53  $\geq 97.0\%$ ), Oxalic acid (OA,  $\geq 97.0\%$ ), Malic acid (MA,  $\geq 97.0\%$ ) and Tartaric acid (TA,  
54  $\geq 97.0\%$ ) were all purchased from Aladdin Biochemical Technology Co., Ltd. All  
55 solvents (HPLC grade) used for sample processing and analysis, including  
56 dichloromethane, n-hexane, methanol and acetonitrile, were purchased from Sigma-  
57 Aldrich Corporation. Sodium bicarbonate ( $\text{NaHCO}_3$ ,  $\geq 98\%$ ), sodium hydroxide  
58 ( $\text{NaOH}$ , analytical grade), hydrochloric acid ( $\text{HCl}$ ,  $\geq 98\%$ ), phosphoric acid ( $\text{H}_3\text{PO}_4$ ,  
59  $\geq 98\%$ ), 5,5-dimethyl-1-pyrroline-N-oxide (DMPO,  $\geq 98\%$ ), 2,2'-bipyridine (BPY,  
60  $\geq 99\%$ ), were obtained from Shanghai Macklin Biochemical Co., Ltd. Potassium  
61 dichromate ( $\text{K}_2\text{Cr}_2\text{O}_7$ ,  $\geq 98\%$ ), sulfuric acid ( $\text{H}_2\text{SO}_4$ , analytical grade) ferrous sulfate  
62 ( $\text{FeSO}_4$ ,  $\geq 98\%$ ) were obtained from Shanghai Pharmaceutical Group Chemical  
63 Reagents Co., Ltd.

#### 64 **Text S2. Methods of soil physicochemical properties**

65 Soil organic matter (SOM) was measured using  $\text{K}_2\text{Cr}_2\text{O}_7$  oxidation external  
66 heating method. First, 1.0 g of soil was placed into a 50 mL centrifuge tube. Next, 5  
67 mL of  $\text{K}_2\text{Cr}_2\text{O}_7$  solution and 5 mL of  $\text{H}_2\text{SO}_4$  were added to the tube to facilitate mixing.  
68 The mixture was then placed in a 100 °C incubator and heated for 90 minutes. After  
69 this, the volume was adjusted to 50 mL by adding distilled water. The sample was  
70 subsequently centrifuged, and the supernatant was collected. The absorbance of the

---

71 supernatant was measured at a wavelength of 590 nm using a UV-vis  
72 spectrophotometer[1].

73 Soil Electrical Conductivity (EC) was measured using water extraction method.  
74 Both oven-dried and air-dried soil samples were first sieved through a 2-mm mesh.  
75 Exactly  $50.00 \pm 0.01$  g of each soil sample was weighed into a wide-mouth bottle. Then,  
76 250 mL of CO<sub>2</sub>-free deionized water was added to the bottle, which was immediately  
77 sealed to prevent atmospheric CO<sub>2</sub> absorption. The mixture was vigorously shaken for  
78 3 minutes to ensure complete soil-water interaction. After shaking, the suspension was  
79 rapidly filtered through a Buchner funnel under vacuum to obtain a clear extract. The  
80 filtrate was promptly analyzed for electrical conductivity using a calibrated  
81 conductivity meter at room temperature ( $25 \pm 1^\circ\text{C}$ ). All extractions were performed in  
82 triplicate to ensure reproducibility.

### 83 **Text S3. Purification method of soil samples**

84 Purification column was used to purify the extract, the column was pre-washed  
85 with 10 mL n-hexane and dichloromethane, respectively. The leaching rate was  
86 controlled at 2 mL/min. Before the anhydrous sodium sulfate at the top was exposed to  
87 air, the polytetrafluoroethylene piston at the bottom of the chromatographic column  
88 was closed and the effluent was discarded. To purify the extract, about 1 mL of the  
89 concentrated extract was transferred to the chromatographic column, and the  
90 concentrator was washed three times with 2 mL n-hexane. All the washing liquid was  
91 transferred to the chromatographic column, and the target substance was eluted with 25  
92 mL n-hexane solution before the anhydrous sodium sulfate at the top was exposed to

---

93 the air. The eluent was collected in the concentrator. The eluent was concentrated to  
94 about 1 mL by nitrogen blowing enrichment method, added to about 3 mL acetonitrile,  
95 and then concentrated to less than 1 mL, the solvent was completely converted to  
96 acetonitrile, and the volume was determined to be 1 mL to be measured.

#### 97 **Text S4. Quantification of ·OH**

98 At the predetermined time intervals, 0.5 g of soil was taken into a 50 mL centrifuge  
99 tube and 10 mL methanol was added to extract 7 - hydroxycoumarin (7 - COU). The  
100 sample was ultrasound and centrifuged at 3000 r/min for 5 min, the supernatant was  
101 collected into a nitrogen blow tube, nitrogen was blown to near dryness and then 1 mL  
102 of methanol was added. The supernatant was filtered through 0.22 μm filter membrane.  
103 The filtered supernatant was injected into a liquid phase vial to determine the  
104 concentration of 7 - COU. The instrument of HPLC (Thermo Fisher Ultra 3000)  
105 equipped with a ultraviolet detector was used to analyze 7-COU at  $\lambda = 228$  nm. The  
106 mobile phase was a mixture of aqueous phosphate and acetonitrile (v/v = 85:15) at a  
107 flow rate of 1.0 mL/min [2].

#### 108 **Text S5. Electron paramagnetic resonance (EPR) analysis**

109 The electron paramagnetic resonance (EPR) spectra were collected using a Bruker  
110 EMX/plus EPR spectrometer (E500-9.5/12, Germany). The parameters of the EPR  
111 spectrometer were set as: center field at 3510 G, X-band microwave frequency of 9.85  
112 GHz, microwave power of 1.70 mW, spectral window of 100 G, modulation amplitude  
113 of 1.00 G, modulation frequency of 100 kHz, time constant of 163.84 ms, conversion  
114 time 40.00 ms, sweep time 40.96 s and 5 times of X-scans.

---

**115 Text S6. Determination of dissolved and adsorbed Fe in soil**

116 At predetermined time intervals, 0.5 g of soil was taken into 5 mL centrifuge tube,  
117 4 mL of deionized water was added. The sample was shaken for 30 min and  
118 centrifuged at 3000 r/min for 5 min. The supernatant was collected to obtain dissolved  
119 Fe. The residual soil was treated with 3 mL H<sub>2</sub>SO<sub>4</sub> and 1 mL HF and digested at 120  
120 °C for 30 min, and then 1 mL H<sub>3</sub>BO<sub>4</sub> solution was added to stand for 10 min. The sample  
121 was filtered to obtain adsorbed Fe. The dissolved Fe and adsorbed Fe were determined  
122 by 1,10-o-phenanthroline colorimetric method [3].

**123 Text S7. Cyclic voltammetry (CV) test**

124 Cyclic voltammetry (CV) was performed on a computer-controlled CHI-660C  
125 electrochemical workstation using a three-electrode cell, using a platinum electrode as  
126 the working electrode, an Ag/AgCl electrode (saturated with KCl) as the reference  
127 electrode, and a saturated calomel reference electrode (SCE) as the auxiliary electrode  
128 between -0.10 and +1.30V. CV were recorded at a scan rate (v) of 50 mV/s in a 0.05  
129 M KCl solution (pH 6) containing 20 mM of Fe(II) or Fe(II)-CA. These electrolyte  
130 solutions were purged with argon for 30 min for removal of dissolved oxygen before  
131 starting the measurements.

**132 Text S8. Determination of the intermediates of BaP**

133 To analyze the possible intermediates of BaP degradation, the sampled solution  
134 was measured by Ultra-High Performance Liquid Chromatography coupled with  
135 Quadrupole-Orbitrap High-Resolution Mass Spectrometry (UHPLC-Q-Orbitrap  
136 HRMS, Thermo Scientific, USA) with a Hypersil GOLD C18 column (150 × 2.1 mm,

---

137 3  $\mu\text{m}$ ). The following chromatographic conditions were used: flow rate of 0.3 mL/min,  
138 injection volume of 5  $\mu\text{L}$ , mobile phase A consisting of a 0.1 % formic acid aqueous  
139 solution, and mobile phase B consisting of acetonitrile. The gradient elution program  
140 started with 10 % mobile phase B for 1 min, followed by a linear increase to 99 %  
141 mobile phase B over 3 min, and then returned to the initial ratio and maintained for 6  
142 min. The mass spectrometry conditions included a mass scanning range of 50–800 m/z  
143 in the positive mode, with a source temperature of 350 °C and a sheath gas flow rate of  
144 12 L/min [4].

145

146

147

148

149

150

151

152

153

154

155

156

157

158

159

160 **Table S1.** Physicochemical Properties of the Soil in this Study.

| Parameter                     | Soil-1 | Soil-2    | Soil-3 | Soil-4 | Soil-5       | Soil-6 | Soil-7   |
|-------------------------------|--------|-----------|--------|--------|--------------|--------|----------|
| Location                      | Hainan | Chongqing | Jilin  | Hebei  | Heilongjiang | Yunnan | Liaoning |
| pH                            | 6.89   | 5.5       | 6.24   | 5.74   | 5.09         | 8.45   | 7.62     |
| Organic matter content (g/kg) | 15.96  | 11.20     | 39.68  | 25.71  | 22.75        | 172.5  | 104.3    |
| Fe (II) <sub>dis</sub> (g/kg) | 1.354  | 0.794     | 0.421  | 0.040  | 0.026        | 0.004  | 1.232    |
| Fe (II) <sub>ad</sub> (g/kg)  | 2.804  | 2.173     | 1.921  | 1.139  | 0.320        | 0.250  | 1.275    |
| EC (us/cm)                    | 66.70  | 22.18     | 122.75 | 107.10 | 22.75        | 172.50 | 104.3    |

161

162

163

164

165

166

167

168

169

170

171

172

173

174 **Table S2.** Physicochemical properties of the selected LMWOAs in this study.

| Name                  | Structure                                                                         | $\alpha$ -OH | -COOH |
|-----------------------|-----------------------------------------------------------------------------------|--------------|-------|
| Citric acid<br>(CA)   | 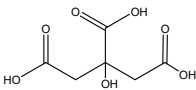 | 1            | 3     |
| Malic acid<br>(MA)    |  | 1            | 2     |
| Tartaric acid<br>(TA) |  | 2            | 2     |
| Oxalic acid<br>(OA)   |  | 2            | 2     |

175

176

177

178

179

180

181

182

183

184

185

186

187

188

189 **Table S3.** Physicochemical properties of the selected PAHs in this study.

|      | Name                             | Structure                                                                         | Formula                         | IP (ev) <sup>c</sup> |
|------|----------------------------------|-----------------------------------------------------------------------------------|---------------------------------|----------------------|
| PAHs | Benzo(a)anthracene<br>(BaA)      | 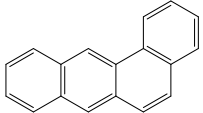 | C <sub>18</sub> H <sub>12</sub> | 7.45                 |
|      | Benzo(a)pyrene<br>(BaP)          |  | C <sub>20</sub> H <sub>12</sub> | 7.12                 |
|      | Indeno(1,2,3-cd)pyrene<br>(IcdP) |  | C <sub>22</sub> H <sub>12</sub> | 7.84                 |
|      | Dibenzo(a,h)anthracene<br>(DaA)  |  | C <sub>22</sub> H <sub>14</sub> | 7.40                 |

190 The relative information of PAHs were obtained from the National Institute of Standards and Technology (NIST)  
 191 Chemistry Web Book (<http://webbook.nist.gov/chemistry/ion-ser.html>).

192

193

194

195

196

197

198

199

200

201

202

203

204 **Table S4.** Identified degradation products of BaP degradation by the CA group.

| Products NO. | RT (min) | m/z (M+H) | Chemical Formula                               | Structural Formula                                                                   | NL     |
|--------------|----------|-----------|------------------------------------------------|--------------------------------------------------------------------------------------|--------|
| P1           | 5.82     | 284.0832  | C <sub>20</sub> H <sub>11</sub> O <sub>2</sub> | 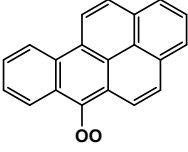   | 2.38E5 |
| P2           | 7.23     | 285.0910  | C <sub>20</sub> H <sub>12</sub> O <sub>2</sub> |    | 1.55E7 |
| P3           | 6.53     | 301.0859  | C <sub>20</sub> H <sub>12</sub> O <sub>3</sub> |   | 3.60E5 |
| P4           | 5.25     | 317.0808  | C <sub>20</sub> H <sub>12</sub> O <sub>4</sub> |  | 9.01E4 |
| P5           | 7.91     | 319.0965  | C <sub>20</sub> H <sub>14</sub> O <sub>4</sub> |  | 5.60E5 |
|              |          |           |                                                |  |        |

|     |      |           |                   |                                                                                      |        |
|-----|------|-----------|-------------------|--------------------------------------------------------------------------------------|--------|
| P6  | 7.23 | 283.0744  | $C_{20}H_{10}O_2$ | 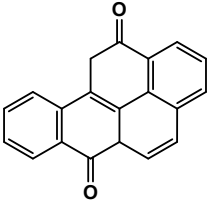   | 3.1E5  |
| P7  | 5.41 | 275.1067  | $C_{19}H_{14}O_2$ |    | 5.60E4 |
| P8  | 4.92 | 215.0703  | $C_{13}H_{10}O_3$ |    | 1.31E5 |
| P9  | 5.41 | 273.0910  | $C_{19}H_{12}O_2$ |    | 1.08E4 |
| P10 | 8.97 | 279.1591  | $C_{16}H_{22}O_4$ |   | 7.71E6 |
| P11 | 5.14 | 161.0597  | $C_{10}H_8O_2$    |  | 1.64E5 |
| P12 | 2.00 | 123.0441  | $C_7H_6O_2$       |  | 4.34E5 |
| P13 | 1.40 | 143.03389 | $C_6H_6O_4$       |  | 8.45E5 |

205

206

207

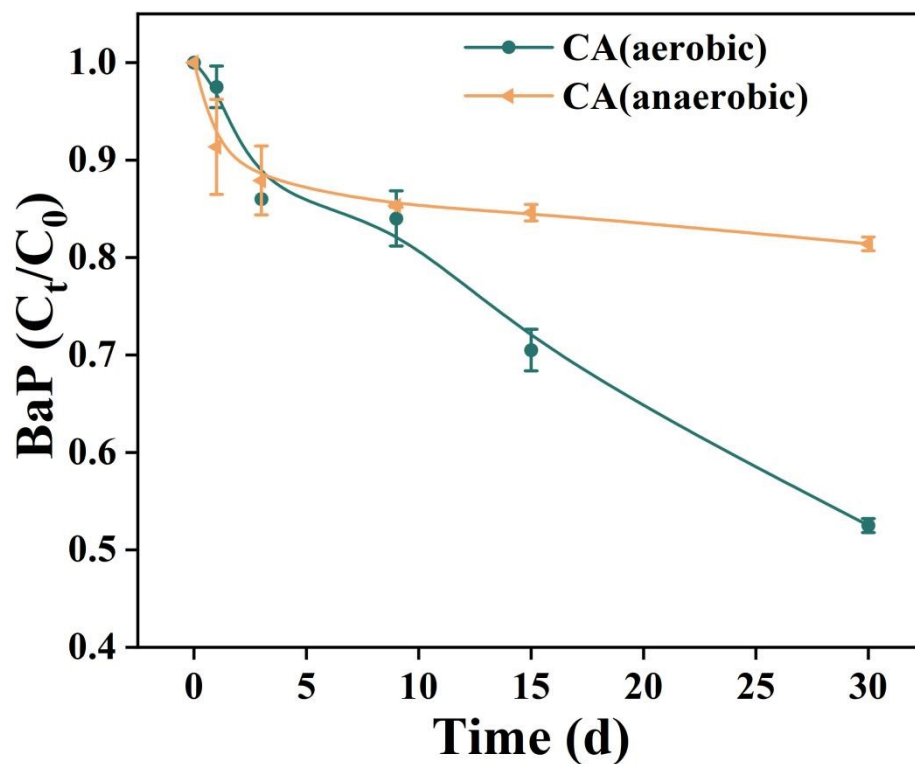

208

209 **Figure S1.** Degradation rates of BaP with N<sub>2</sub> in sterilized soil. Conditions: T = 25°C,

210 RH ~ 50 ± 5%, initial soil pH = 7.0, [CA] = 40 mM.

211

212

213

214

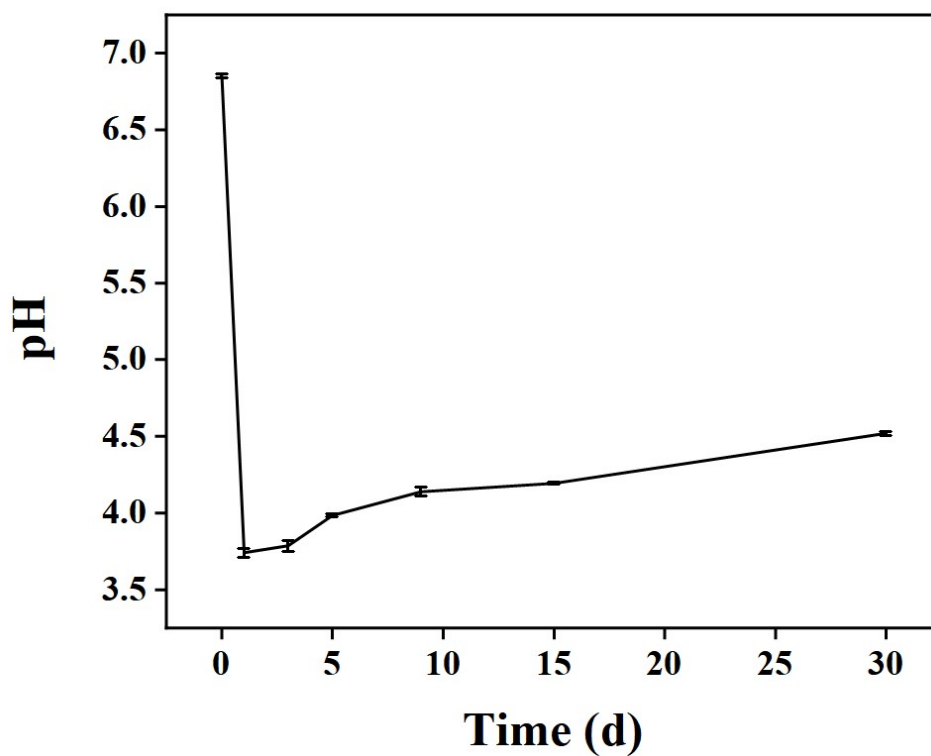

215

216 **Figure S2.** Changes of soil pH in the presence of CA. Conditions: T = 25°C, RH ~ 50

217 ± 5%, initial soil pH = 7.0, [CA] = 40 mM.

218

219

220

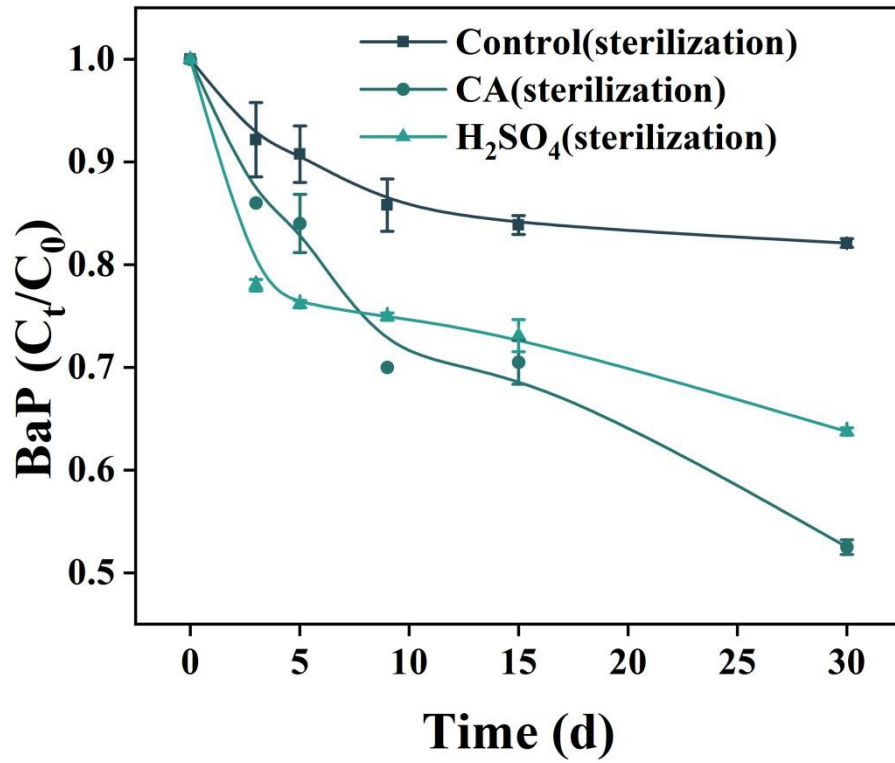

221

222 **Figure S3.** Degradation rates of BaP with  $H_2SO_4$  in sterilized soil. Conditions: T =

223  $25^\circ C$ , RH  $\sim 50 \pm 5\%$ , initial soil pH = 7.0, [CA] = 40 mM.

224

225

226

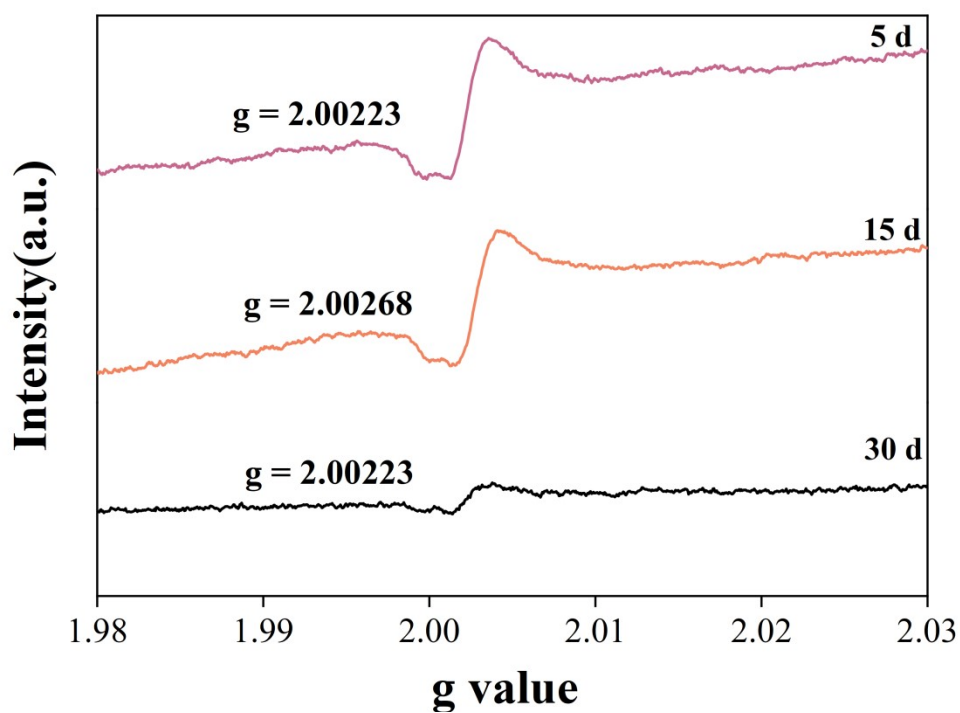

227

228 **Figure S4.** Persistent free radicals (PFRs) generation with the addition of CA in BaP-

229 contaminated soil. Conditions:  $T = 25^{\circ}\text{C}$ ,  $\text{RH} \sim 50 \pm 5\%$ , initial soil  $\text{pH} = 7.0$ ,  $[\text{CA}] =$

230 40 mM.

231

232

233

234

235

236

237

238

239

240

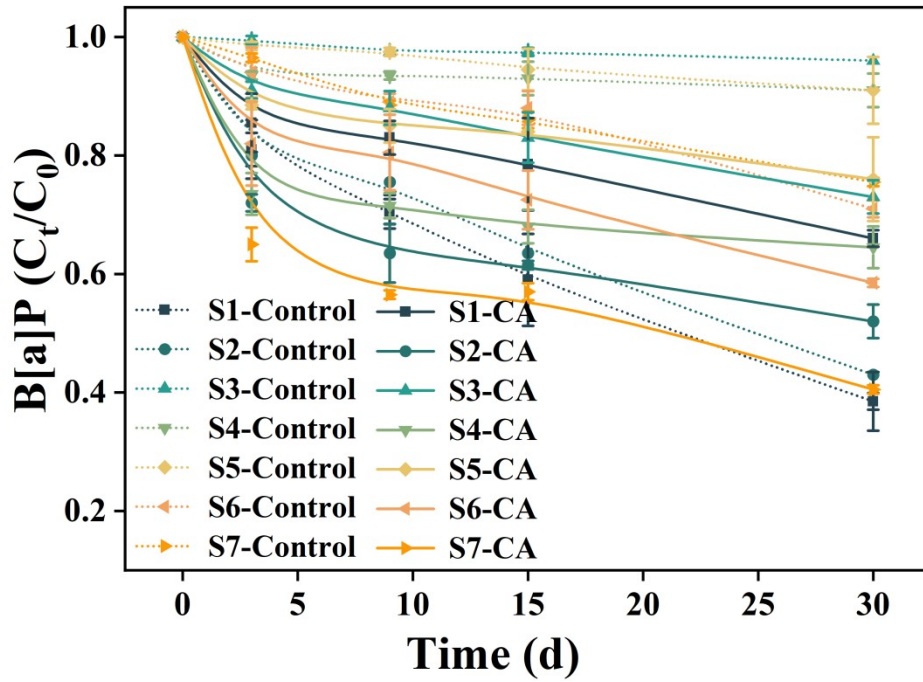

241

242 **Figure S5.** The BaP degradation in different kinds of soil with CA; S1, S2, S3, S4, S5,

243 S6 and S7 represented the soils of areas Hainan, Chongqing, Jilin, Hebei, Heilongjiang

244 Yunnan and Liaoning, respectively.

245

246

247

248

249

250

251

252

253

254

255

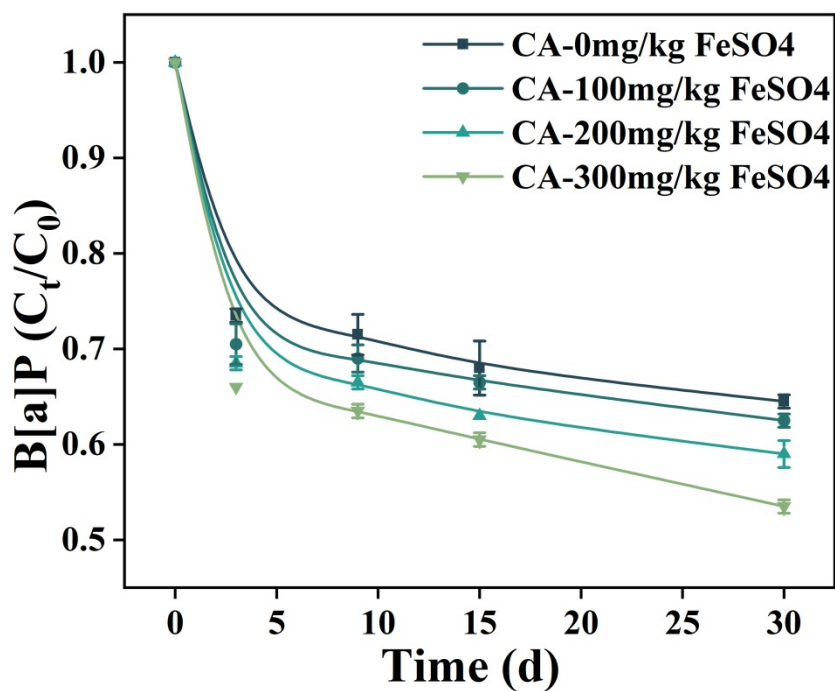

256

257 **Figure S6.** The BaP degradation in different concentration of FeSO<sub>4</sub> with CA.

258 Conditions: T = 25°C, RH ~ 50 ± 5%, initial soil pH = 7.0, [CA] = 40 mM.

259

260

261

262

263

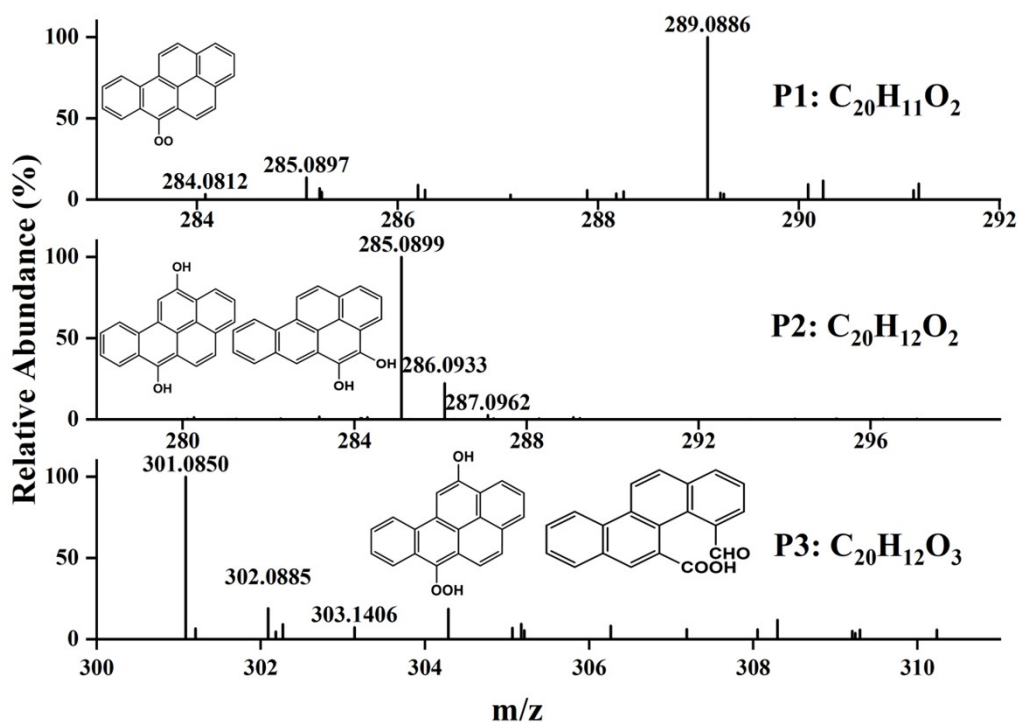

264

265 **Figure S7.** Mass spectra of P1, P2, and P3 products identified in the BaP degradation

266 process.

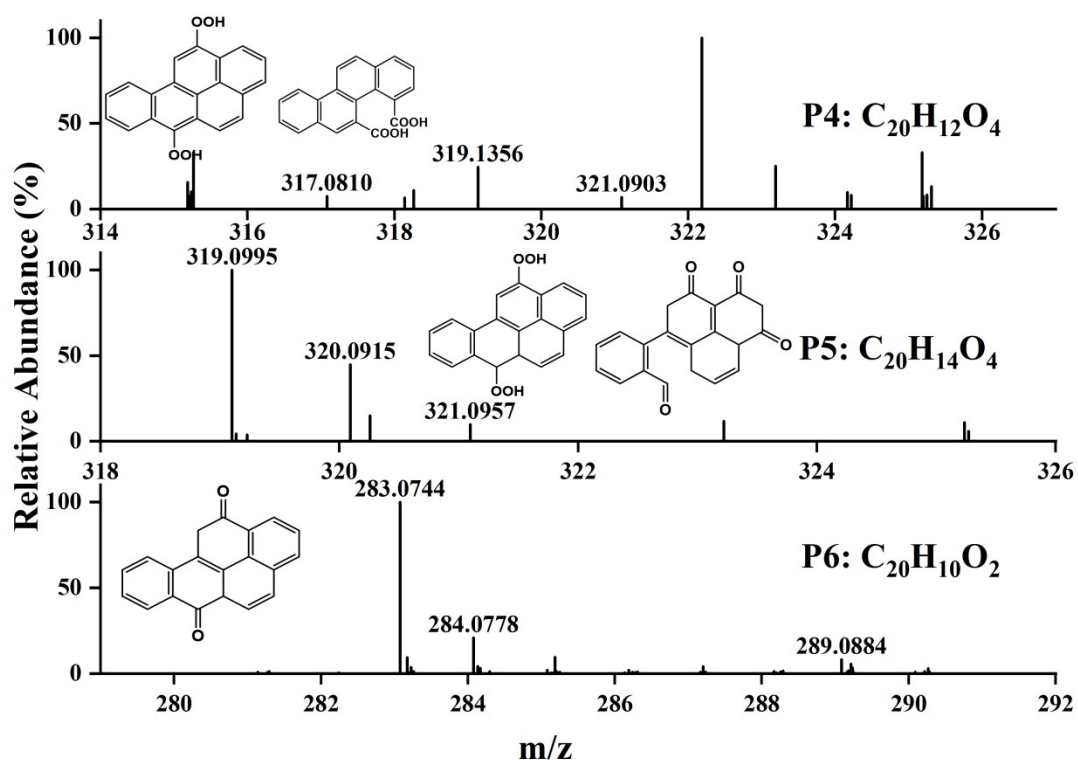

267

268 **Figure S8.** Mass spectra of P4, P5, and P6 products identified in the BaP degradation

269 process.

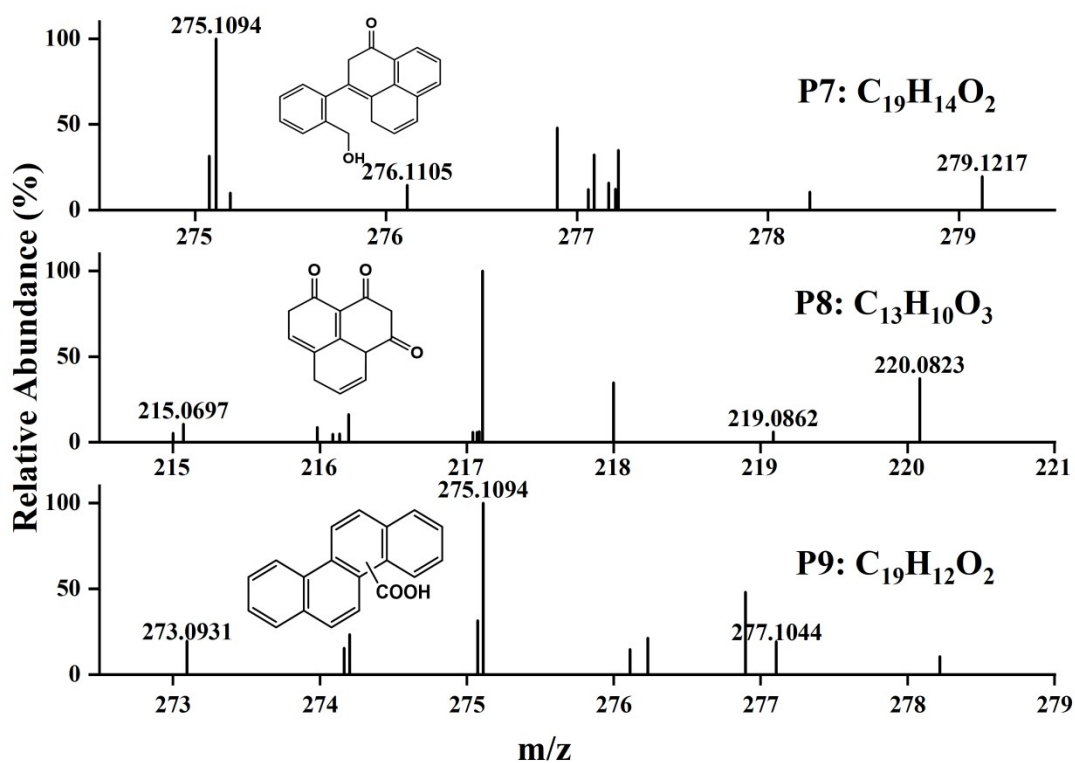

270

271 **Figure S9.** Mass spectra of P7, P8, and P9 products identified in the BaP degradation

272 process.

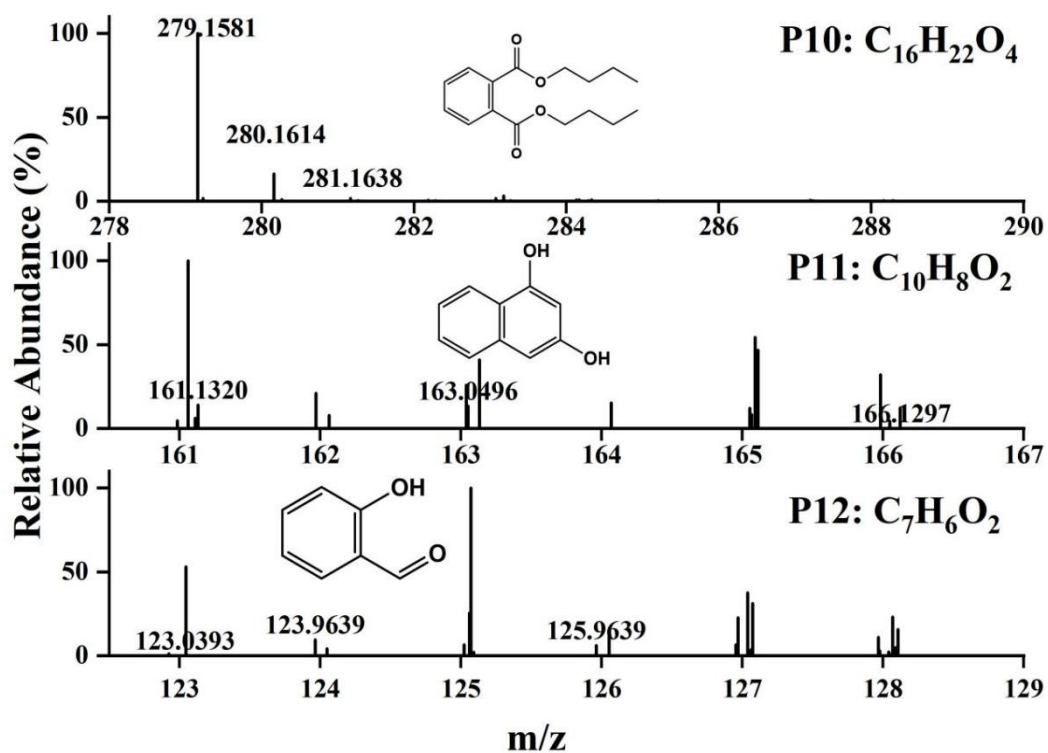

273

274 **Figure S10.** Mass spectra of P10, P11, and P12 products identified in the BaP

275 degradation process.

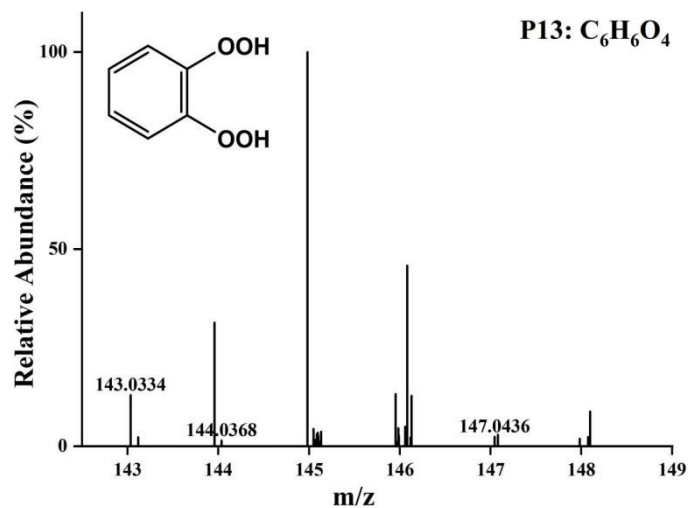

276

277 **Figure S11.** Mass spectra of P13 products identified in the BaP degradation process.

278

279

280

281

282

283

284

285

286

287

288

289

290

291

292

---

293 **References**

- 294 [1] Kwiatkowska-Malina J. Qualitative and quantitative soil organic matter estimation  
295 for sustainable soil management. *J SOIL SEDIMENT* 2018; **18**: 2801-12.
- 296 [2] Louit G, Foley S, Cabillic J, *et al.*. The reaction of coumarin with the OH radical  
297 revisited: hydroxylation product analysis determined by fluorescence and  
298 chromatography. *RADIAT PHYS CHEM* 2005; **72**: 119-24.
- 299 [3] Cheng D, Yuan S, Liao P, Zhang P. Oxidizing Impact Induced by Mackinawite  
300 (FeS) Nanoparticles at Oxic Conditions due to Production of Hydroxyl Radicals.  
301 *ENVIRON SCI TECHNOL* 2016; **50**: 11646-53.
- 302 [4] Pan J, Wang G, Nong J, Xie Q. Biodegradation of benzo(a)pyrene by a genetically  
303 engineered *Bacillus licheniformis*: Degradation, metabolic pathway and toxicity  
304 analysis. *CHEM ENG J* 2023; **478**: 147478.  
305
